# Supplementary material
Source: MDPI journal article supplement (https://www.mdpi.com/1424-2818/15/5/625)
Supplement: s1 [file s1]

## SUPPLEMENTARY MATERIALS

# Environmental Factors Affecting Amphibian Communities in River Basins of the Southern Apennines

Alessandro Nessi<sup>1</sup>, Sara Cioccarelli<sup>2</sup>, Paolo Tremolada<sup>1</sup>, Pasquale Gariano<sup>3,4</sup>, Maria Grandinetti<sup>4</sup>, Alessandro Balestrieri<sup>1</sup>, Raoul Manenti<sup>1</sup>

<sup>1</sup> Department of Environmental Science and Policy, University of Milan, I-20133 Milan, Italy;

<sup>2</sup> Department of Biology, University of Pisa, I-56126 Pisa, Italy

<sup>3</sup> TEA Engineering s.r.l, I-56121 Pisa, Italy

<sup>4</sup> CESRAM—Centro Studi e Ricerca Ambiente Marino, I-88065 Guardavalle, Italy;

**Table S1.** Locality, altitude, and coordinates of the sampling areas in the eight rivers.

| River  | Code | Locality                                   | Altitude<br>m a.s.l. | Latitude      | Longitude     |
|--------|------|--------------------------------------------|----------------------|---------------|---------------|
| Savuto | SAV1 | San Mango D'Aquino<br>(Catanzaro Province) | 85                   | 39°04'15.71"N | 16°11'01.30"E |
|        | SAV2 | Altilia<br>(Cosenza Province)              | 168                  | 39°05'58.51"N | 16°15'01.40"E |
|        | SAV3 | Balzata<br>(Cosenza Province)              | 560                  | 39°10'05.88"N | 16°22'31.48"E |
|        | SAV4 | Parenti<br>(Cosenza Province)              | 720                  | 39°09'48.59"N | 16°25'13.17"E |
|        | SAV5 | Mouth<br>(Catanzaro Province)              | 25                   | 39°02'27.04"N | 16°07'47.53"E |
| Simeri | SIM1 | San Pietro<br>(Catanzaro Province)         | 430                  | 39°01'08.15"N | 16°37'07.89"E |
|        | SIM2 | Villaggio Mancuso<br>(Catanzaro Province)  | 1197                 | 39°05'07.76"N | 16°34'18.26"E |
| Tacina | TAC1 | Cotronei<br>(Crotone Province)             | 764                  | 39°09'03.07"N | 16°43'45.22"E |
|        | TAC2 | Riserva Gariglione<br>(Catanzaro Province) | 1355                 | 39°08'45.32"N | 16°38'03.39"E |
| Alli   | ALL1 | Taverna<br>(Catanzaro Province)            | 480                  | 39°01'37.61"N | 16°33'46.91"E |
| Lese   | LES1 | Belvedere Spinello<br>(Crotone Province)   | 140                  | 39°13'54.01"N | 16°51'03.64"E |
|        | LES2 | Belvedere Spinello<br>(Crotone Province)   | 180                  | 39°14'53.24"N | 16°50'12.75"E |
| Neto   | NET1 | Cotronei<br>(Crotone Province)             | 173                  | 39°10'13.08"N | 16°48'26.88"E |

|        |      |                                             |     |               |               |
|--------|------|---------------------------------------------|-----|---------------|---------------|
| Amato  | AMA1 | San Pietro Apostolo<br>(Catanzaro Province) | 390 | 38°58'47.62"N | 16°29'01.79"E |
|        | AMA2 | Serrastretta (Catanzaro<br>Province)        | 680 | 39°00'52.33"N | 16°25'59.40"E |
| Corace | COR1 | Gimigliano (Catanzaro<br>Province)          | 520 | 39°00'00.49"N | 16°30'59.53"E |
|        | COR2 | Carlopoli<br>(Catanzaro Province)           | 670 | 39°02'00.05"N | 16°26'32.19"E |

**Table S2.** River length, watershed surface, source locality and altitude, main tributaries and mouth of the river, lakes and European protected area in the watershed.

| River  | Length (km) | Watershed (km <sup>2</sup> ) | Source                                            | Main tributaries                            | Mouth                                                             | Lakes                           | European protected areas |
|--------|-------------|------------------------------|---------------------------------------------------|---------------------------------------------|-------------------------------------------------------------------|---------------------------------|--------------------------|
| Savuto | 48          | 411                          | Spineto, Aprigliano municipality<br>1200 m a.s.l. | Tarsitano, Piciaro, Tassitello, Merone      | Tyrrhenian Sea near Nocera Terinese (Catanzaro Province)          | Lake Savuto (1100 m a.s.l.)     | /                        |
| Neto   | 85          | 1070                         | Mount Timpone Sorbella locality, 1850 m a.s.l.    | Neto Baracco, Capo Neto, Neto Ferrara, Lese | Ionian Sea near Fasana, Strongoli Municipality (Crotone Province) | Lake Ariamacina (1350 m a.s.l.) | SIC IT9320095            |
| Lese   | 43          | 210                          | Mount Pettinascura 1689 m a.s.l.                  | Senapite, Lepre                             | River Neto's tributary                                            | /                               | SIC IT9320123            |
| Tacina | 58          | 426                          | Mount Timpone Morello locality 1521 m a.s.l.      | Soleo, Mesoraca                             | Ionian Sea Squillace Gulf                                         | /                               | SIC IT9320129            |
| Corace | 48          | 294                          | Bianchi municipality 1050 m a.s.l.                | Acciaio, Melito, Usito                      | Ionian Sea Squillace Gulf                                         | /                               | /                        |
| Simeri | 45          | 129                          | Little Sila Massif 1200 m a.s.l.                  | /                                           | Ionian Sea Squillace Gulf                                         | /                               | /                        |

|       |    |     |                                                  |                               |                                                       |   |               |
|-------|----|-----|--------------------------------------------------|-------------------------------|-------------------------------------------------------|---|---------------|
| Alli  | 46 | 128 | Colle Bastarda, Schicella locality 1495 m a.s.l. | Litrello, Valli               | Ionian Sea Squillace Gulf                             | / | /             |
| Amato | 56 | 441 | Mount Comunelli, 900 m a.s.l.                    | Galice, Pesipe, Sant'Ippolito | Tyrrhenian Sea near Maida Marina (Catanzaro Province) | / | SIC IT9330124 |

**Table S3.** Environmental features of the sampling stations from River Savuto: numerical codes of the bank and riverbed heterogeneity and tree and shrub cover refer to Materials and Methods section; River = main watercourse; Branch= small tributaries and lateral streams; Pool = pools and ponds.

| Sampling area | Sampling station | Habitat | Surface (m²) | Length (m) | Width (m) | Depth (m) | Bank | Riverbed | Tree cover | Shrub cover | Brightness (lux) |
|---------------|------------------|---------|--------------|------------|-----------|-----------|------|----------|------------|-------------|------------------|
| SAV 1         | Sav 1a           | Branch  | 129          | 30         | 4,3       | 0,1       | 3    | 2        | 3          | 2           | 3000             |
|               | Sav 1b           | Pool    | 32           | 6,4        | 5         | 0,6       | 1    | 1        | 4          | 2           | 2300             |
|               | Sav 1c           | River   | 28,5         | 9,5        | 3         | 0,3       | 1    | 2        | 3          | 3           | 37000            |
|               | Sav 1d           | Branch  | 9,15         | 6,1        | 1,5       | 0,05      | 2    | 2        | 5          | 3           | 35000            |
|               | Sav 1e           | River   | 225          | 10         | 22,5      | 0,35      | 2    | 2        | 1          | 4           | 41000            |
| SAV 2         | Sav 2a           | Branch  | 210          | 60         | 3,5       | 1         | 3    | 1        | 3          | 4           | 17000            |
|               | Sav 2b           | Pool    | 0,6          | 2          | 0,3       | 0,05      | 2    | 1        | 3          | 3           | 2590             |
|               | Sav 2c           | Branch  | 525          | 150        | 3,5       | 0,25      | 2    | 3        | 3          | 2           | 74000            |
|               | Sav 2d           | River   | 12           | 10         | 1,2       | 0,4       | 2    | 2        | 2          | 2           | 74000            |
|               | Sav 2e           | Pool    | 250          | 50         | 5         | 0,5       | 4    | 2        | 3          | 4           | 70000            |
| SAV 3         | Sav 3a           | Branch  | 45,82        | 7,9        | 5,8       | 0,8       | 4    | 3        | 1          | 3           | 77000            |
|               | Sav 3b           | Pool    | 9,8          | 3,5        | 2,8       | 0,45      | 3    | 2        | 1          | 3           | 70000            |
|               | Sav 3c           | River   | 18           | 4,5        | 4         | 0,8       | 3    | 4        | 1          | 3           | 60000            |
|               | Sav 3d           | Pool    | 3,19         | 2,9        | 1,1       | 0,03      | 1    | 1        | 1          | 3           | 60000            |
|               | Sav 3e           | Pool    | 25,92        | 5,4        | 4,8       | 1         | 2    | 3        | 1          | 3           | 2300             |
| SAV 4         | Sav 4a           | Pool    | 344,75       | 19,7       | 17,5      | 0,75      | 3    | 4        | 0          | 2           | 15000            |
|               | Sav 4b           | Branch  | 81           | 30         | 2,7       | 0,17      | 3    | 3        | 0          | 2           | 15000            |
|               | Sav 4c           | Pool    | 20,88        | 5,8        | 3,6       | 0,25      | 2    | 1        | 0          | 2           | 15000            |
|               | Sav 4d           | Pool    | 6,21         | 2,7        | 2,3       | 0,15      | 3    | 1        | 0          | 2           | 15000            |

|       |        |        |       |     |      |      |   |   |   |   |       |
|-------|--------|--------|-------|-----|------|------|---|---|---|---|-------|
| SAV 5 | Sav 5a | Pool   | 444,5 | 35  | 12,7 | 1    | 1 | 1 | 0 | 0 | 7500  |
|       | Sav 5b | Pool   | 8,1   | 3,6 | 2,25 | 0,11 | 2 | 2 | 0 | 0 | 7500  |
|       | Sav 5c | Pool   | 9,6   | 4   | 2,4  | 0,03 | 2 | 2 | 0 | 2 | 16000 |
|       | Sav 5d | Branch | 210   | 35  | 6    | 0,45 | 2 | 2 | 0 | 2 | 16000 |
|       | Sav 5e | Pool   | 60    | 12  | 5    | 0,05 | 2 | 2 | 0 | 3 | 15000 |

**Table S4.** Amphibian presence in the sampling stations from River Savuto: egg = eggs, td = tadpoles, ju = juveniles and ad = adult. P = presence of a species by calling monitoring.

| Sampling area | Sampling station | <i>Rana italica</i> | <i>Bufo bufo</i> | <i>Pelophylax kl.esculentus</i> | <i>Rana dalmatina</i> | <i>Hyla intermedia</i> | <i>Salamandrina atra</i> | <i>Salamandrina atra</i> |
|---------------|------------------|---------------------|------------------|---------------------------------|-----------------------|------------------------|--------------------------|--------------------------|
| SAV 1         | Sav 1a           | 0                   | 200 (td)         | 0                               | 0                     | 0                      | 0                        | 0                        |
|               | Sav 1b           | 0                   | 1000(td)         | 1 (ad)                          | 0                     | 0                      | 0                        | 0                        |
|               | Sav 1c           | 0                   | 100 (td)         | 0                               | 0                     | 0                      | 0                        | 0                        |
|               | Sav 1d           | 0                   | 20 (td)          | 0                               | 0                     | 0                      | 0                        | 0                        |
|               | Sav 1e           | 0                   | 0                | 0                               | 0                     | 0                      | 0                        | 0                        |
| SAV 2         | Sav 2a           | 0                   | 0                | 2 (ad)                          | 5 (td)                | 0                      | 0                        | 0                        |
|               | Sav 2b           | 0                   | 0                | 4 (ad)                          | 0                     | 0                      | 0                        | 0                        |
|               | Sav 2c           | 0                   | 0                | 1 (ad)                          | 0                     | 0                      | 0                        | 0                        |
|               | Sav 2d           | 2 (td)              | 0                | 0                               | 0                     | 0                      | 0                        | 0                        |
|               | Sav 2e           | 0                   | 0                | 20 (ad)                         | 0                     | 0                      | 0                        | 0                        |
| SAV 3         | Sav 3a           | 1 (td)              | 0                | 0                               | 0                     | 0                      | 0                        | 0                        |
|               | Sav 3b           | 15 (td)             | 0                | 0                               | 0                     | 0                      | 0                        | 0                        |
|               | Sav 3c           | 0                   | 0                | 0                               | 0                     | 0                      | 0                        | 0                        |
|               | Sav 3d           | 0                   | 0                | 0                               | 0                     | 0                      | 0                        | 0                        |
|               | Sav 3e           | 0                   | 0                | 0                               | 0                     | 0                      | 0                        | 0                        |



|       |        |         |          |        |   |   |   |   |
|-------|--------|---------|----------|--------|---|---|---|---|
| SAV 4 | Sav 4a | 0       | 3 (egg)  | 0      | 0 | 0 | 0 | 0 |
|       | Sav 4b | 3 (ad)  | 1 (egg)  | 0      | 0 | 0 | 0 | 0 |
|       | Sav 4c | 0       | 0        | 0      | 0 | 0 | 0 | 0 |
|       | Sav 4d | 20 (td) | 0        | 2 (ju) | 0 | 0 | 0 | 0 |
| SAV 5 | Sav 5a | 0       | 0        | 0      | 0 | P | 0 | 0 |
|       | Sav 5b | 0       | 0        | 1 (ad) | 0 | 0 | 0 | 0 |
|       | Sav 5c | 0       | 100 (td) | 0      | 0 | 0 | 0 | 0 |
|       | Sav 5d | 0       | 10 (td)  | 0      | 0 | 0 | 0 | 0 |
|       | Sav 5e | 0       | 0        | 0      | 0 | 0 | 0 | 0 |

**Table S5.** Environmental features of the sampling stations from River Simeri: numerical codes of the bank and riverbed heterogeneity and tree and shrub cover refer to Materials and Methods section; River = main watercourse; Branch= small tributaries and lateral streams; Pool = pools and ponds.

| Sampling area | Sampling station | Habitat | Surface (m <sup>2</sup> ) | Length (m) | Width (m) | Depth (m) | Bank | Riverbed | Tree cover | Shrub cover | Brightness (lux) |
|---------------|------------------|---------|---------------------------|------------|-----------|-----------|------|----------|------------|-------------|------------------|
| SIM 1         | Sim 1a           | River   | 50,6                      | 9,2        | 5,5       | 1,46      | 4    | 3        | 3          | 3           | 17000            |
|               | Sim 1b           | Branch  | 1,8                       | 1,8        | 1         | 0,03      | 4    | 3        | 3          | 4           | 17000            |
|               | Sim 1c           | River   | 22,05                     | 4,9        | 4,5       | 0,4       | 4    | 3        | 3          | 4           | 63000            |
|               | Sim 1d           | River   | 72                        | 12         | 6         | 1,9       | 2    | 3        | 3          | 3           | 63000            |
|               | Sim 1e           | Ponte   | 40                        | 10         | 4         | 1         | 2    | 3        | 3          | 3           | 60000            |
|               | Sim 1f           | Pool    | 17,5                      | 7          | 2,5       | 0,5       | 2    | 2        | 3          | 4           | 60000            |
| SIM 2         | Sim 2a           | Pool    | 15,5                      | 5          | 3,1       | 0,03      | 2    | 2        | 3          | 4           | 5000             |
|               | Sim 2b           | Branch  | 8,8                       | 4          | 2,2       | 0,4       | 3    | 5        | 4          | 3           | 5500             |
|               | Sim 2c           | Pool    | 16,96                     | 5,3        | 3,2       | 0,02      | 1    | 1        | 4          | 3           | 5000             |
|               | Sim 2d           | Branch  | 5                         | 10         | 0,5       | 0,02      | 2    | 2        | 5          | 3           | 5000             |
|               | Sim 2e           | River   | 134,3                     | 17         | 7,9       | 0,5       | 2    | 4        | 4          | 2           | 2600             |
|               | Sim 2f           | Pool    | 0,9                       | 0,9        | 1         | 0,04      | 1    | 3        | 4          | 4           | 15700            |
|               | Sim 2g           | River   | 46,2                      | 7          | 6,6       | 0,4       | 4    | 5        | 4          | 2           | 16000            |
|               | Sim 2h           | River   | 120                       | 12         | 10        | 1,8       | 4    | 4        | 4          | 2           | 16000            |
|               | Sim 2i           | Pool    | 12,8                      | 8          | 1,6       | 0,4       | 2    | 3        | 3          | 2           | 1600             |
|               | Sim 2j           | Branch  | 16                        | 8          | 2         | 0,12      | 2    | 2        | 4          | 2           | 1600             |

**Table S6.** Amphibian presence in the sampling stations from River Savuto: egg = eggs, td = tadpoles, lv = larvae, ju = juveniles and ad = adult. P = presence of a species by calling monitoring.

| Sampling area | Sampling station | <i>Rana italica</i> | <i>Bufo bufo</i> | <i>Pelophylax kl.esculentus</i> | <i>Rana dalmatina</i> | <i>Hyla intermedia</i> | <i>Salamandra salamandra</i> | <i>Salamandrina terdigitata</i> |
|---------------|------------------|---------------------|------------------|---------------------------------|-----------------------|------------------------|------------------------------|---------------------------------|
| SIM 1         | Sim 1a           | 0                   | 0                | 0                               | 0                     | 0                      | 0                            | 0                               |
|               | Sim 1b           | 1 (ju)              | 0                | 0                               | 0                     | 0                      | 0                            | 0                               |
|               | Sim 1c           | 0                   | 0                | 0                               | 0                     | 0                      | 0                            | 0                               |
|               | Sim 1d           | 0                   | 0                | 0                               | 0                     | 0                      | 0                            | 0                               |
|               | Sim 1e           | 0                   | 6 (egg)          | 0                               | 1 (egg)               | 0                      | 0                            | 0                               |
|               | Sim 1f           | 0                   | 5 (egg)          | 0                               | 0                     | 0                      | 0                            | 0                               |
| SIM 2         | Sim 2a           | 0                   | 0                | 0                               | 0                     | 0                      | 4 (1 ad, 3 lv)               | 0                               |
|               | Sim 2b           | 1 (ad)              | 0                | 0                               | 0                     | 0                      | 0                            | 0                               |
|               | Sim 2c           | 1 (ju)              | 0                | 0                               | 0                     | 0                      | 0                            | 0                               |
|               | Sim 2d           | 1 (ju)              | 0                | 0                               | 0                     | 0                      | 0                            | 0                               |
|               | Sim 2e           | 0                   | 0                | 0                               | 0                     | 0                      | 0                            | 0                               |
|               | Sim 2f           | 1 (ad)              | 0                | 0                               | 0                     | 0                      | 0                            | 0                               |
|               | Sim 2g           | 5 (egg)             | 0                | 0                               | 0                     | 0                      | 0                            | 0                               |
|               | Sim 2h           | 2 (egg)             | 0                | 0                               | 0                     | 0                      | 0                            | 0                               |
|               | Sim 2i           | 0                   | 0                | 0                               | 8 (3 egg, 4 td, 1 ju) | 0                      | 0                            | 0                               |
|               | Sim 2j           | 0                   | 0                | 0                               | 0                     | 0                      | 0                            | 0                               |

**Table S7.** Environmental features of the sampling stations from River Tacina: numerical codes of the bank and riverbed heterogeneity and tree and shrub cover refer to Materials and Methods section; River = main watercourse; Branch= small tributaries and lateral streams; Pool = pools and ponds.

| Sampling area | Sampling station | Habitat | Surface (m <sup>2</sup> ) | Length (m) | Width (m) | Depth (m) | Bank | Riverbed | Tree cover | Shrub cover | Brightness (lux) |
|---------------|------------------|---------|---------------------------|------------|-----------|-----------|------|----------|------------|-------------|------------------|
| TAC 1         | Tac 1a           | River   | 240                       | 8          | 30        | 1         | 3    | 4        | 3          | 2           | 10000            |
|               | Tac 1b           | River   | 700                       | 100        | 7         | 0,45      | 4    | 5        | 3          | 3           | 6200             |
|               | Tac 1c           | River   | 24                        | 6          | 4         | 0,3       | 4    | 4        | 3          | 3           | 6200             |
|               | Tac 1d           | River   | 5,4                       | 1,8        | 3         | 0,45      | 3    | 1        | 2          | 3           | 1270             |
| TAC 2         | Tac 2a           | Branch  | 800                       | 40         | 20        | 1,3       | 2    | 2        | 3          | 1           | 12400            |
|               | Tac 2b           | Branch  | 18                        | 20         | 0,9       | 0,08      | 3    | 3        | 4          | 1           | 12400            |
|               | Tac 2c           | River   | 21                        | 3          | 7         | 0,45      | 3    | 2        | 3          | 1           | 12000            |
|               | Tac 2d           | Pool    | 300                       | 25         | 12        | 2         | 2    | 4        | 3          | 2           | 5500             |
|               | Tac 2e           | Branch  | 11                        | 10         | 1,1       | 0,35      | 2    | 2        | 3          | 1           | 5500             |
|               | Tac 2f           | Branch  | 75                        | 15         | 5         | 0,4       | 2    | 2        | 4          | 2           | 15000            |

**Table S8.** Amphibian presence in the sampling stations from River Tacina: egg = eggs, td = tadpoles, ju = juveniles and ad = adult. P = presence of a species by calling monitoring.

| Sampling area | Sampling station | <i>Rana italica</i> | <i>Bufo bufo</i> | <i>Pelophylax kl.esculentus</i> | <i>Rana dalmatina</i> | <i>Hyla intermedia</i> | <i>Salamandra salamandra</i> | <i>Salamandrina terdigitata</i> |
|---------------|------------------|---------------------|------------------|---------------------------------|-----------------------|------------------------|------------------------------|---------------------------------|
| TAC 1         | Tac 1a           | 0                   | 6 (5 ov, 1 ad)   | 0                               | 0                     | 0                      | 0                            | 0                               |
|               | Tac 1b           | 10 (9 ju, 1 ad)     | 3 (ad)           | 0                               | 0                     | 0                      | 0                            | 3 (ad)                          |
|               | Tac 1c           | 1 (ad)              | 0                | 0                               | 0                     | 0                      | 0                            | 3 (ad)                          |
|               | Tac 1d           | 0                   | 0                | 0                               | 0                     | 0                      | 0                            | 0                               |
| TAC 2         | Tac 2a           | 1 (ad)              | 10 (egg)         | 0                               | 0                     | 0                      | 0                            | 0                               |
|               | Tac 2b           | 1 (ad)              | 0                | 0                               | 0                     | 0                      | 0                            | 0                               |
|               | Tac 2c           | 0                   | 0                | 0                               | 0                     | 0                      | 0                            | 0                               |
|               | Tac 2d           | 0                   | 0                | 0                               | 0                     | 0                      | 0                            | 0                               |
|               | Tac 2e           | 0                   | 0                | 0                               | 1 (egg)               | 0                      | 0                            | 0                               |
|               | Tac 2f           | 11 (10 egg, 1 ju)   | 0                | 0                               | 15 (egg)              | 0                      | 0                            | 0                               |

**Table S9.** Environmental features of the sampling stations from River Alli: numerical codes of the bank and riverbed heterogeneity and tree and shrub cover refer to Materials and Methods section; River = main watercourse; Branch= small tributaries and lateral streams; Pool = pools and ponds.

| Sampling area | Sampling station | Habitat | Surface (m <sup>2</sup> ) | Length (m) | Width (m) | Depth (m) | Bank | Riverbed | Tree cover | Shrub cover | Brightness (lux) |
|---------------|------------------|---------|---------------------------|------------|-----------|-----------|------|----------|------------|-------------|------------------|
| ALL 1         | All 1a           | Pool    | 7,28                      | 2,8        | 2,6       | 0,28      | 3    | 4        | 2          | 3           | 68000            |
|               | All 1b           | River   | 48                        | 7,5        | 6,4       | 0,4       | 4    | 4        | 3          | 2           | 18000            |
|               | All 1c           | River   | 18                        | 3          | 6         | 0,35      | 4    | 3        | 3          | 3           | 3000             |

**Table S10.** Amphibian presence in the sampling stations from River Alli: egg = eggs, td = tadpoles, ju = juveniles and ad = adult. P = presence of a species by calling monitoring.

| Sampling area | Sampling station | <i>Rana italica</i>    | <i>Bufo bufo</i> | <i>Pelophylax kl.esculentus</i> | <i>Rana dalmatina</i> | <i>Hyla intermedia</i> | <i>Salamandra salamandra</i> | <i>Salamandrina terdigitata</i> |
|---------------|------------------|------------------------|------------------|---------------------------------|-----------------------|------------------------|------------------------------|---------------------------------|
| ALL 1         | All 1a           | 11 (1 ju, 10 td)       | 0                | 0                               | 0                     | 0                      | 0                            | 0                               |
|               | All 1b           | 13 (10 td, 1 ju, 1 ad) | 0                | 0                               | 0                     | 0                      | 0                            | 0                               |
|               | All 1c           | 2 (1 ju, 1 ad)         | 0                | 0                               | 0                     | 0                      | 0                            | 0                               |

**Table S11.** Environmental features of the sampling stations from River Lese: numerical codes of the bank and riverbed heterogeneity and tree and shrub cover refer to Materials and Methods section; River = main watercourse; Branch= small tributaries and lateral streams; Pool = pools and ponds.

| Sampling area | Sampling station | Habitat | Surface (m²) | Length (m) | Width (m) | Depth (m) | Bank | Riverbed | Tree cover | Shrub cover | Brightness (lux) |
|---------------|------------------|---------|--------------|------------|-----------|-----------|------|----------|------------|-------------|------------------|
| LES 1         | Les 1a           | Pool    | 16,94        | 12,1       | 1,4       | 0,05      | 2    | 2        | 0          | 2           | 18000            |
|               | Les 1b           | Pool    | 18,36        | 10,2       | 1,8       | 0,3       | 2    | 2        | 1          | 4           | 18000            |
|               | Les 1c           | River   | 2,16         | 2,4        | 0,9       | 0,05      | 3    | 2        | 0          | 3           | 12000            |
|               | Les 1d           | River   | 1950         | 100        | 19,5      | 0,35      | 3    | 5        | 0          | 3           | 18000            |
|               | Les 1e           | Pool    | 1,76         | 2,2        | 0,8       | 0,09      | 1    | 2        | 0          | 3           | 15000            |
| LES 2         | Les 2a           | Pool    | 464          | 32         | 14,5      | 2         | 2    | 2        | 1          | 1           | 8800             |
|               | Les 2b           | Pool    | 17,25        | 11,5       | 1,5       | 0,5       | 2    | 2        | 0          | 1           | 5000             |
|               | Les 2c           | River   | 830          | 50         | 16,6      | 0,45      | 2    | 2        | 2          | 2           | 8000             |



**Table S12.** Amphibian presence in the sampling stations from River Lese: egg = eggs, td = tadpoles, ju = juveniles and ad = adult. P = presence of a species by calling monitoring.

| Sampling area | Sampling station | <i>Rana italica</i> | <i>Bufo bufo</i> | <i>Pelophylax kl.esculentus</i> | <i>Rana dalmatina</i> | <i>Hyla intermedia</i> | <i>Salamandra salamandra</i> | <i>Salamandrina terdigitata</i> |
|---------------|------------------|---------------------|------------------|---------------------------------|-----------------------|------------------------|------------------------------|---------------------------------|
| LES 1         | Les 1a           | 0                   | 200 (td)         | 0                               | 0                     | 0                      | 0                            | 0                               |
|               | Les 1b           | 0                   | 0                | 13 (10 td, 3 ad)                | 0                     | 1 (td)                 | 0                            | 0                               |
|               | Les 1c           | 0                   | 6 (egg)          | 0                               | 0                     | 0                      | 0                            | 0                               |
|               | Les 1d           | 0                   | 0                | 1 (ad)                          | 0                     | 0                      | 0                            | 0                               |
|               | Les 1e           | 0                   | 1000 (td)        | 0                               | 0                     | 0                      | 0                            | 0                               |
| LES 2         | Les 2a           | 0                   | 0                | 0                               | 0                     | 0                      | 0                            | 0                               |
|               | Les 2b           | 0                   | 0                | 1 (ad)                          | 0                     | 0                      | 0                            | 0                               |
|               | Les 2c           | 0                   | 0                | 0                               | 0                     | 0                      | 0                            | 0                               |

**Table S13.** Environmental features of the sampling stations from River Neto: numerical codes of the bank and riverbed heterogeneity and tree and shrub cover refer to Materials and Methods section; River = main watercourse; Branch= small tributaries and lateral streams; Pool = pools and ponds.

| Sampling area | Sampling station | Habitat | Surface (m <sup>2</sup> ) | Length (m) | Width (m) | Depth (m) | Bank | Riverbed | Tree cover | Shrub cover | Brightness (lux) |
|---------------|------------------|---------|---------------------------|------------|-----------|-----------|------|----------|------------|-------------|------------------|
| NET 1         | Net 1a           | River   | 1820                      | 200        | 9,1       | 1,1       | 3    | 3        | 2          | 2           | 6300             |
|               | Net 1b           | River   | 1390                      | 100        | 13,9      | 0,4       | 3    | 4        | 3          | 3           | 6300             |
|               | Net 1c           | Branch  | 15                        | 10         | 1,5       | 0,25      | 3    | 3        | 2          | 3           | 6000             |

**Table S14.** Amphibian presence in the sampling stations from River Neto: egg = eggs, td = tadpoles, ju = juveniles and ad = adult. P = presence of a species by calling monitoring.

| Sampling area | Sampling station | <i>Rana italica</i> | <i>Bufo bufo</i> | <i>Pelophylax kl.esculentus</i> | <i>Rana dalmatina</i> | <i>Hyla intermedia</i> | <i>Salamandra salamandra</i> | <i>Salamandrina terdigitata</i> |
|---------------|------------------|---------------------|------------------|---------------------------------|-----------------------|------------------------|------------------------------|---------------------------------|
| NET 1         | Net 1a           | 0                   | 0                | 0                               | 0                     | 0                      | 0                            | 0                               |
|               | Net 1b           | 0                   | 0                | 0                               | 0                     | 0                      | 0                            | 0                               |
|               | Net 1c           | 1 (ad)              | 0                | 1 (ad)                          | 0                     | 0                      | 0                            | 0                               |

**Table S15.** Environmental features of the sampling stations from River Corace: numerical codes of the bank and riverbed heterogeneity and tree and shrub cover refer to Materials and Methods section; River = main watercourse; Branch= small tributaries and lateral streams; Pool = pools and ponds.

| Sampling area | Sampling station | Habitat | Surface (m <sup>2</sup> ) | Length (m) | Width (m) | Depth (m) | Bank | Riverbed | Tree cover | Shrub cover | Brightness (lux) |
|---------------|------------------|---------|---------------------------|------------|-----------|-----------|------|----------|------------|-------------|------------------|
| COR 1         | Cor 1a           | River   | 468                       | 40         | 11,7      | 0,4       | 3    | 4        | 3          | 3           | 12000            |
|               | Cor 1b           | Pool    | 7,8                       | 6,5        | 1,2       | 0,23      | 2    | 3        | 3          | 4           | 14000            |
|               | Cor 1c           | Pool    | 6,72                      | 4,2        | 1,6       | 0,21      | 2    | 3        | 3          | 3           | 14000            |
|               | Cor 1d           | River   | 309                       | 30         | 10,3      | 0,5       | 4    | 4        | 3          | 4           | 76000            |
|               | Cor 1e           | Branch  | 34,32                     | 15,6       | 2,2       | 0,32      | 3    | 3        | 4          | 3           | 80000            |
|               | Cor 1f           | River   | 220                       | 20         | 11        | 0,45      | 3    | 4        | 3          | 3           | 80000            |
|               | Cor 1g           | Pool    | 14,58                     | 5,4        | 2,7       | 0,64      | 1    | 2        | 3          | 3           | 80000            |
| COR 2         | Cor 2a           | River   | 26,4                      | 6          | 4,4       | 0,5       | 2    | 2        | 3          | 3           | 8600             |
|               | Cor 2b           | River   | 184                       | 40         | 4,6       | 0,6       | 2    | 2        | 3          | 3           | 8500             |
|               | Cor 2c           | River   | 137,6                     | 16         | 8,6       | 0,8       | 3    | 2        | 2          | 3           | 11500            |
|               | Cor 2d           | River   | 120                       | 20         | 6         | 0,44      | 3    | 2        | 3          | 3           | 8500             |
|               | Cor 2e           | River   | 13,6                      | 6,8        | 2         | 0,64      | 4    | 3        | 3          | 3           | 10000            |
|               | Cor 2f           | River   | 3,75                      | 2,5        | 1,5       | 0,4       | 2    | 1        | 3          | 3           | 10000            |

**Table S16.** Amphibian presence in the sampling stations from River Corce: egg = eggs, td = tadpoles, ju = juveniles and ad = adult. P = presence of a species by calling monitoring.

| Sampling area | Sampling station | <i>Rana italica</i> | <i>Bufo bufo</i> | <i>Pelophylax kl.esculentus</i> | <i>Rana dalmatina</i> | <i>Hyla intermedia</i> | <i>Salamandra salamandra</i> | <i>Salamandrina terdigitata</i> |
|---------------|------------------|---------------------|------------------|---------------------------------|-----------------------|------------------------|------------------------------|---------------------------------|
| COR 1         | Cor 1a           | 100 (td)            | 10 (egg)         | 0                               | 0                     | 0                      | 0                            | 0                               |
|               | Cor 1b           | 0                   | 0                | 0                               | 30 (td)               | 4 (egg)                | 0                            | 0                               |
|               | Cor 1c           | 0                   | 5 (egg)          | 0                               | 0                     | 0                      | 0                            | 0                               |
|               | Cor 1d           | 21 (1 ad, 20 td)    | 6 (egg)          | 0                               | 0                     | 0                      | 0                            | 0                               |
|               | Cor 1e           | 1 (td)              | 5 (egg)          | 0                               | 0                     | 0                      | 0                            | 0                               |
|               | Cor 1f           | 20 (td)             | 0                | 0                               | 0                     | 0                      | 0                            | 0                               |
|               | Cor 1g           | 200 (td)            | 7 (egg)          | 0                               | 0                     | 0                      | 0                            | 0                               |
| COR 2         | Cor 2a           | 0                   | 0                | 0                               | 0                     | 0                      | 0                            | 0                               |
|               | Cor 2b           | 0                   | 6 (egg)          | 0                               | 0                     | 0                      | 0                            | 0                               |
|               | Cor 2c           | 0                   | 8 (egg)          | 0                               | 0                     | 0                      | 0                            | 0                               |
|               | Cor 2d           | 2 (ad)              | 5 (egg)          | 0                               | 0                     | 0                      | 0                            | 0                               |
|               | Cor 2e           | 32 (30 td, 2 ju)    | 0                | 0                               | 0                     | 0                      | 0                            | 0                               |
|               | Cor 2f           | 15 (td)             | 0                | 0                               | 0                     | 0                      | 0                            | 0                               |

**Table S17.** Environmental features of the sampling stations from River Amato: numerical codes of the bank and riverbed heterogeneity and tree and shrub cover refer to Materials and Methods section; River = main watercourse; Branch= small tributaries and lateral streams; Pool = pools and ponds.

| Sampling area | Sampling station | Habitat | Surface (m <sup>2</sup> ) | Length (m) | Width (m) | Depth (m) | Bank | Riverbed | Tree cover | Shrub cover | Brightness (lux) |
|---------------|------------------|---------|---------------------------|------------|-----------|-----------|------|----------|------------|-------------|------------------|
| AMA 1         | Ama 1a           | Pool    | 4,96                      | 3,1        | 1,6       | 0,12      | 3    | 3        | 2          | 3           | 15000            |
|               | Ama 1b           | River   | 540                       | 50         | 10,8      | 0,51      | 4    | 3        | 2          | 3           | 15000            |
|               | Ama 1c           | Pool    | 1,08                      | 1,2        | 0,9       | 0,1       | 3    | 3        | 2          | 3           | 12000            |
|               | Ama 1d           | Branch  | 150                       | 20         | 7,5       | 0,16      | 3    | 2        | 3          | 3           | 11000            |
|               | Ama 1e           | Pool    | 11,16                     | 3,6        | 3,1       | 0,55      | 3    | 3        | 2          | 3           | 17000            |
|               | Ama 1f           | Pool    | 15                        | 6          | 2,5       | 0,35      | 1    | 1        | 2          | 2           | 17000            |
| AMA 2         | Ama 2a           | Branch  | 42                        | 7          | 6         | 0,3       | 2    | 3        | 3          | 3           | 8000             |
|               | Ama 2b           | River   | 550                       | 50         | 11        | 1,5       | 3    | 2        | 3          | 4           | 8000             |
|               | Ama 2c           | River   | 350                       | 50         | 7         | 1,3       | 4    | 4        | 3          | 3           | 10000            |
|               | Ama 2d           | Pool    | 36                        | 6          | 6         | 0,8       | 1    | 2        | 2          | 3           | 18000            |

**Table S18.** Amphibian presence in the sampling stations from River Amato: egg = eggs, td = tadpoles, ju = juveniles and ad = adult; P = presence of a species by calling monitoring.

| Sampling area | Sampling station | <i>Rana italica</i> | <i>Bufo bufo</i> | <i>Pelophylax kl.esculentus</i> | <i>Rana dalmatina</i> | <i>Hyla intermedia</i> | <i>Salamandrina atra</i> | <i>Salamandrina atra terdigitata</i> |
|---------------|------------------|---------------------|------------------|---------------------------------|-----------------------|------------------------|--------------------------|--------------------------------------|
| AMA 1         | Ama 1a           | 35 (td)             | 0                | 0                               | 0                     | 0                      | 0                        | 0                                    |
|               | Ama 1b           | 17 (15 td, 2 ad)    | 0                | 0                               | 0                     | 0                      | 0                        | 0                                    |
|               | Ama 1c           | 10 (td)             | 0                | 0                               | 0                     | 0                      | 0                        | 0                                    |
|               | Ama 1d           | 60 (td)             | 0                | 0                               | 0                     | 0                      | 0                        | 0                                    |
|               | Ama 1e           | 200 (td)            | 8 (egg)          | 0                               | 0                     | 0                      | 0                        | 0                                    |
|               | Ama 1f           | 20 (td)             | 5 (egg)          | 0                               | 0                     | 0                      | 0                        | 0                                    |
| AMA 2         | Ama 2a           | 0                   | 0                | 0                               | 0                     | 0                      | 0                        | 0                                    |
|               | Ama 2b           | 0                   | 5 (egg)          | 0                               | 0                     | 0                      | 0                        | 0                                    |
|               | Ama 2c           | 0                   | 0                | 0                               | 0                     | 0                      | 0                        | 0                                    |
|               | Ama 2d           | 100 (td)            | 1 (ad)           | 0                               | 1000 (td)             | 0                      | 0                        | 0                                    |

**Table S19.** Otter (present “+” or absent “–”) and fish (species and total biomass) in the 17 sampling sites on the eight rivers in the Sila Massif from Smirollo et al. (2019)[38].

| River  | Code | Altitude<br>m a.s.l. | Otter<br>presence | Fish presence                                                                                             |                                               |
|--------|------|----------------------|-------------------|-----------------------------------------------------------------------------------------------------------|-----------------------------------------------|
|        |      |                      |                   | species                                                                                                   | Total<br>biomass<br>(g f.w. m <sup>-2</sup> ) |
| Savuto | SAV1 | 85                   | +                 | <i>Squalius cephalus</i><br><i>Rutilus rubilio</i><br><i>Cobitis taenia</i><br><i>Carassius carassius</i> | 2.4                                           |
|        | SAV2 | 168                  | +                 | <i>Squalius cephalus</i><br><i>Rutilus rubilio</i><br><i>Cobitis taenia</i><br><i>Carassius carassius</i> | 4.49                                          |
|        | SAV3 | 560                  | +                 | <i>Salmo trutta</i>                                                                                       | 0.46                                          |
|        | SAV4 | 760                  | +                 | <i>Salmo trutta</i>                                                                                       | 3.93                                          |
|        | SAV5 | 25                   | –                 | <i>n.e.</i>                                                                                               | <i>n.e.</i>                                   |
| Simeri | SIM1 | 430                  | –                 | <i>Salmo trutta</i>                                                                                       | 2.31                                          |
|        | SIM2 | 1197                 | –                 | <i>Salmo trutta</i>                                                                                       | 4.13                                          |
| Tacina | TAC1 | 764                  | –                 | <i>Salmo trutta</i>                                                                                       | 1.55                                          |
|        | TAC2 | 1355                 | –                 | <i>Salmo trutta</i>                                                                                       | 4.56                                          |
| Alli   | AL1  | 480                  | –                 | <i>Salmo trutta</i>                                                                                       | 2.28                                          |
| Lese   | LES1 | 140                  | +                 | <i>Squalius cephalus</i><br><i>Rutilus rubilio</i><br><i>Cobitis taenia</i><br><i>Anguilla anguilla</i>   | 2.23                                          |
|        | LES2 | 180                  | +                 | <i>Squalius cephalus</i><br><i>Rutilus rubilio</i>                                                        | 4.69                                          |
| Neto   | NET2 | 173                  | +                 | <i>Squalius cephalus</i><br><i>Rutilus rubilio</i><br><i>Anguilla anguilla</i>                            | 5.89                                          |
| Amato  | AM1  | 520                  | +                 | <i>Salmo trutta</i>                                                                                       | 3.89                                          |
|        | AM2  | 680                  | +                 | <i>Salmo trutta</i>                                                                                       | 3.42                                          |
| Corace | CO2  | 520                  | –                 | <i>Salmo trutta</i><br><i>Rutilus rubilio</i><br><i>Gambusia affinis</i>                                  | 3.76                                          |
|        | CO3  | 670                  | –                 | <i>Salmo trutta</i>                                                                                       | 4.64                                          |

n.d. = not evaluated

References



Smiroldo, G.; Gariano, P.; Balestrieri, A.; Manenti, R.; Pini, E.; Tremolada, P. Predation on amphibians may enhance Eurasian otter recovery in southern Italy. *Zool. Sci.* 2019, 36, 273–283.
